# Supplementary material for: Antioxidant Structure–Activity Relationship Analysis of Five Dihydrochalcones
Source: MDPI journal article supplement (doi:10.3390/molecules23051162), 2018-05-12
Supplement: s1 [file s1]

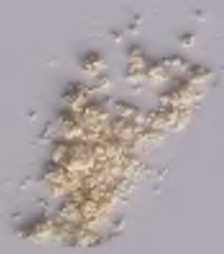

Phloridzin

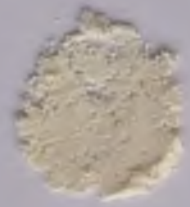

Trilobatin

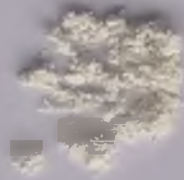

Phloretin

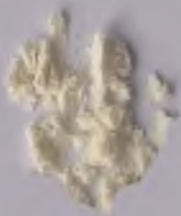

Naringin dihydrochalcone

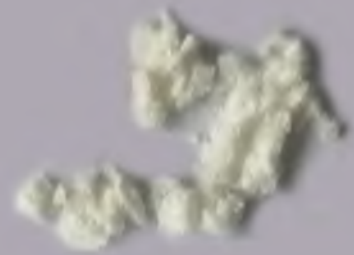

Neohesperidin dihydrochalcone

## 产品分析证书

### Certificate of Analysis

中文名称：根皮素

English Name : Phloretin

别名(Alias): Asebogenol; Dihydronaringenin; Phloretol

产品编码(Cat. No.):BP1088

CAS Number: 60-82-2

分子式(M. F.): C<sub>15</sub>H<sub>14</sub>O<sub>5</sub>

分子量(M. W.): 274.272

批号(Batch No.): PRF9022842

报告日期(Report date): 2018-02-28

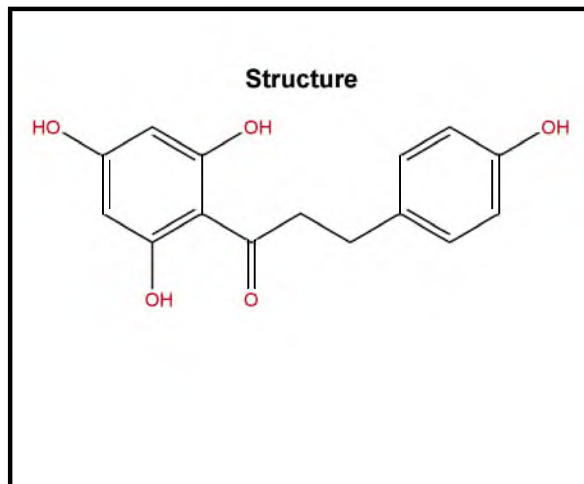

#### 检验结果 ( Analytical result ) :

| 检验项目 ( Test Item )         | 检验指标 ( Specifications )   | 检验结果 ( Results ) |
|----------------------------|---------------------------|------------------|
| 外观Appearance               | Off-white powder          | Off-white powder |
| 干燥失重Loss on drying         | < 3.0%                    | 1.23%            |
| 纯度Purity (HPLC-DAD,286nm)* | ≥98.0%                    | 99.29%           |
| 质谱Mass                     | 274.2±1                   | Conforms         |
| 核磁NMR                      | Comply with the structure | Conforms         |

\* 色谱图见附件 ( Please find HPLC chromatography attached. )

检测方法 ( Test Method ) : Column: Agilent 5HC-C18 , 4.6\*250mm , 5.0um; Column temperature: 30°C; Detection Mode: UV286nm;Flow

Rate: 1.0ml/min; Sample dissolution: 30% Acetonitrile; Mobile Phase: A, Acetonitrile B, 0.1% Phosphoric acid in water;Gradient elution:A,

30%-40%,15min.

贮存条件 ( Storage ) :2~8°C, protected from light, keep package airtight when not in use..

复测期 ( Retest date ) :two years (2020-02-27) under conditions list above.

QC: Zhang Ling

Date: 2018-02-28

QA: Wu Qi

Date: 2018-02-28

**备注(Remarks):** The sample solutions should be prepared and used on the same day, it is the best preparing the solutions immediately before use. If the solutions have to be made up in advance, it should be made as aliquots in tightly sealed vials at less than -20°C. Generally, these might be useable for up to two weeks.

In case of quality issue, please contact us within 15 days after receipt of the product.

## SAMPLE INFORMATION

|                   |                        |                     |              |
|-------------------|------------------------|---------------------|--------------|
| Sample Name:      | Phloretin PRF9022842   | Acquired By:        | System       |
| Sample Type:      | Unknown                | Sample Set Name:    |              |
| Vial:             | 102                    | Acq. Method Set:    | Phloretin    |
| injection #:      | 1                      | Processing Method:  | sample       |
| injection Volume: | 10.00 ul               | Channel Name:       | 286.0nm      |
| Run Time:         | 25.0 Minutes           | Proc. Chnl. Descr.: | PDA 286.0 nm |
|                   |                        |                     |              |
| Date Acquired:    | 2018-2-28 16:29:08 CST |                     |              |
| Date Processed:   | 2018-2-28 17:08:06 CST |                     |              |

### Auto-Scaled Chromatogram

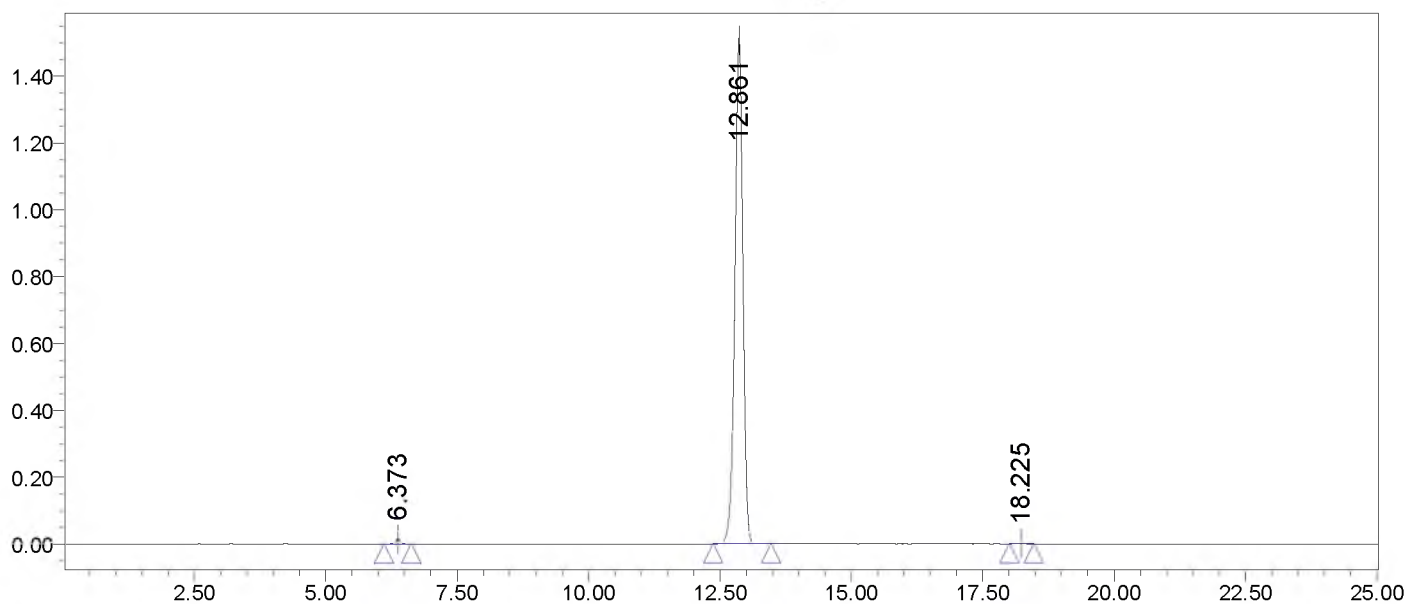

### Peak Results

|   | RT     | Area     | % Area | USP Plate Count | USP Resolution |
|---|--------|----------|--------|-----------------|----------------|
| 1 | 6.373  | 103574   | 0.64   | 17399.14        |                |
| 2 | 12.861 | 16080134 | 99.29  | 34288.96        | 26.96          |
| 3 | 18.225 | 11534    | 0.07   | 63826.66        | 18.98          |

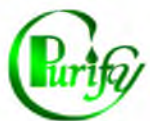

成都普瑞法科技开发有限公司  
Chengdu Biopurify Phytochemicals Ltd.

Add: No.11 Building, No. 388 Rongtaidadao CNSTP  
Wenjiang Zone, Chengdu, Sichuan, 611130 China  
TEL: 028-82633987 FAX: 028-82633165  
E-mail: biopurify@gmail.com sales@biopurify.com  
Web: www.biopurify.com

## Certificate of Analysis

**Product Name:** Phloridzin

**Other Name:**

**Catalogue No.:** BP1089

**Batch No.:** 15083102

**Reported Date:** 2015-08-31

**CAS Number:** 60-81-1

**Mol. Formula:** C<sub>21</sub>H<sub>24</sub>O<sub>10</sub>

**Mol. Weight:** 436.413

**Botanical Source:** Micromelum tephrocarpum

**Type of compound:**

**Identification Method:** Mass, NMR

**Analysis Method of Purity:** HPLC-DAD

**Structure:**

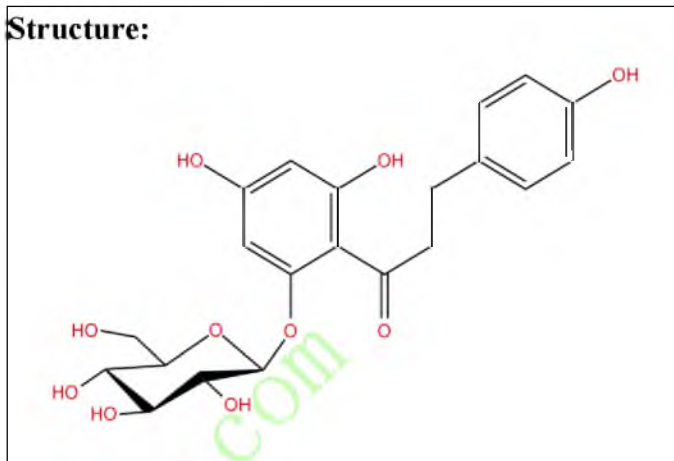

**Analytical result:**

| Test                  | Specification    | Results          |
|-----------------------|------------------|------------------|
| Appearance            | Off-white powder | Off-white powder |
| Loss on drying        | <3.0%            | 1.1%             |
| Purity (HPLC, 285nm)* | ≥98.0%           | 99.20%           |

\* Please find HPLC chromatography attached.

**Package:** Brown vial or HDPE Plastic Bottle

**Storage:** Cool and Dry place, protected from light, keep package airproofed when not in use.

**Expiration:** two years (2017-08-31) under conditions list above.

QC: Meng Pan

Date: 2015-08-31

QA: Lianglei Zhang

Date: 2015-08-31

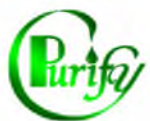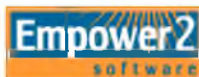

### SAMPLE INFORMATION

|                   |                        |                     |              |
|-------------------|------------------------|---------------------|--------------|
| Sample Name:      | Phloridzin 15083102    | Acquired By:        | panmeng      |
| Sample Type:      | Unknown                | Sample Set Name:    |              |
| Vial:             | 1:C,2                  | Acq. Method Set:    | Phloridzin   |
| Injection #:      | 1                      | Processing Method:  | Samples      |
| Injection Volume: | 10.00 ul               | Channel Name:       | 285.0nm      |
| Run Time:         | 20.0 Minutes           | Proc. Chnl. Descr.: | PDA 285.0 nm |
| Date Acquired:    | 2015-8-31 9:37:48 CST  |                     |              |
| Date Processed:   | 2015-8-31 10:37:03 CST |                     |              |

Auto-Scaled Chromatogram

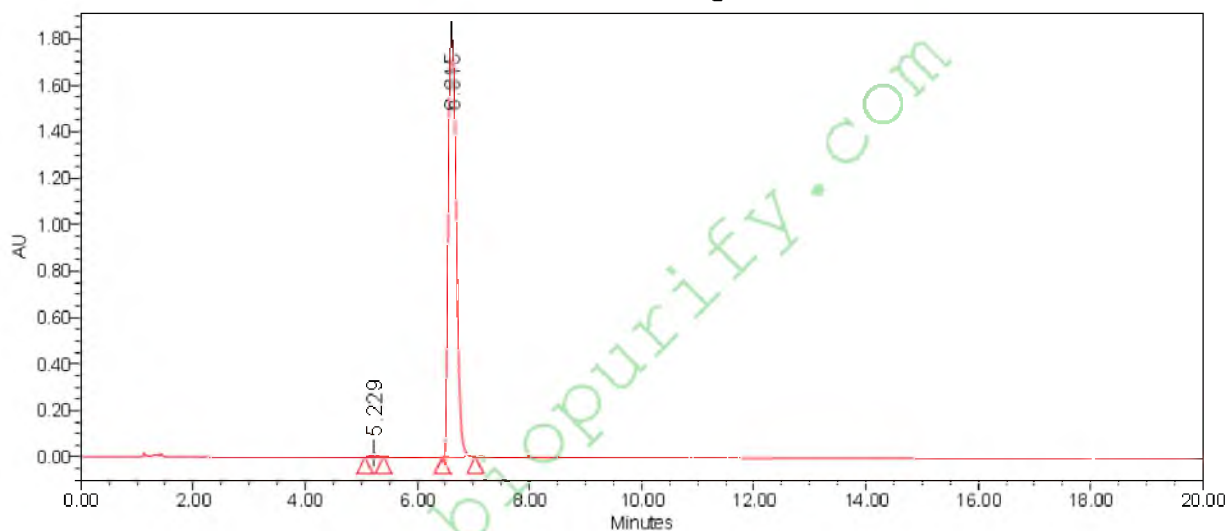

Peak Results

|   | Name | RT    | Area     | % Area | USP Plate Count | USP Resolution |
|---|------|-------|----------|--------|-----------------|----------------|
| 1 |      | 5.229 | 123606   | 0.80   | 9702.32         |                |
| 2 |      | 6.615 | 17529822 | 99.20  | 10920.06        | 6.00           |

Add: No.11 Building, No. 388 Rongtaidadao CNSTP  
Wenjiang Zone, Chengdu, Sichuan, 611130 China  
TEL: 028-82633987 FAX: 028-82633165  
E-mail: biopurify@gmail.com sales@biopurify.com  
Web: www.biopurify.com

## Certificate of Analysis

**Product Name:** Trilobatin

**Other Name:**

**Catalogue No.:** BP1756

**Batch No.:** PRF15092821

**Report date** 2015-09-28

**CAS Number:** 4192-90-9

**Mol. Formula:** C<sub>21</sub>H<sub>24</sub>O<sub>10</sub>

**Mol. Weight:** 436.413

**Type of compound:**

**Botanical Source:**

**Identification Method:** Mass, NMR

**Analysis Method of Purity:** HPLC-DAD

**Analytical result:**

**Structure:**

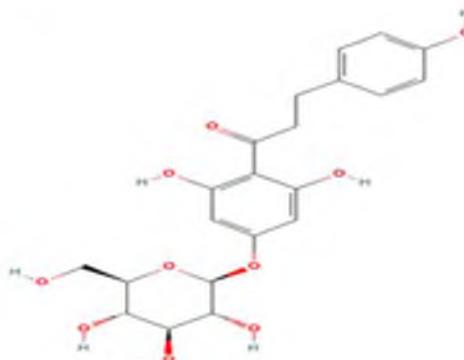

| Test                  | Specification      | Results            |
|-----------------------|--------------------|--------------------|
| Appearance            | Pale Yellow powder | Pale Yellow powder |
| Loss on drying        | <3.0%              | 1.26%              |
| Purity (HPLC,282nm) * | ≥98.0%             | 98.38%             |

\* Please find HPLC chromatography attached.

**Package:** Brown vial or HDPE Plastic Bottle

**Storage:** Cool and Dry place, protected from light, keep package airproofed when not in use.

**Expiration:** two years (2017-09-28) under conditions list above.

QC: *Meng Pan*

Date: 2015-09-28

QA: *Lianglei Zhang*

Date: 2015-09-28

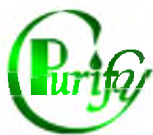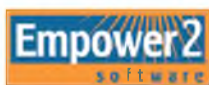

## SAMPLE INFORMATION

|                   |                        |                     |              |
|-------------------|------------------------|---------------------|--------------|
| Sample Name:      | Trilobatin PRF15092821 | Acquired By:        | System       |
| Sample Type:      | Unknown                | Sample Set Name:    |              |
| Vial:             | 18                     | Acq. Method Set:    | Trilobatin   |
| Injection #:      | 1                      | Processing Method:  | Samples      |
| Injection Volume: | 10.00 ul               | Channel Name:       | 282.0nm      |
| Run Time:         | 25.0 Minutes           | Proc. Chnl. Descr.: | PDA 282.0 nm |
| Date Acquired:    | 2015-9-28 13:39:29 CST |                     |              |
| Date Processed:   | 2015-9-28 15:11:08 CST |                     |              |

Auto-Scaled Chromatogram

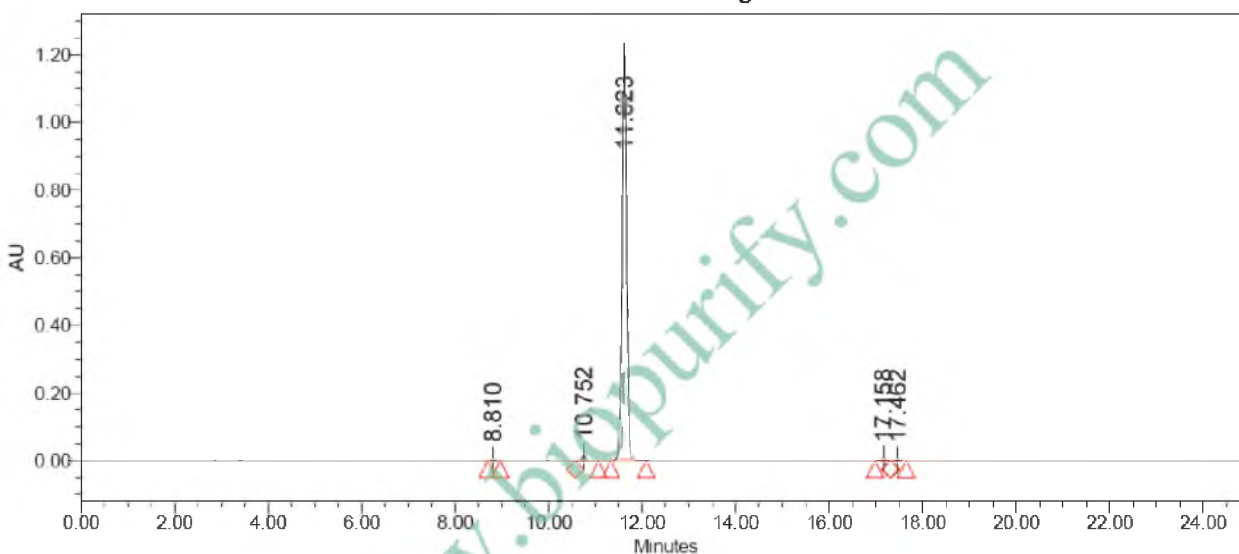

## Peak Results

|   | Name | RT     | Area    | % Area | USP Plate Count | USP Resolution |
|---|------|--------|---------|--------|-----------------|----------------|
| 1 |      | 8.810  | 3610    | 0.21   | 39561.30        |                |
| 2 |      | 10.752 | 90935   | 0.94   | 58864.50        | 10.78          |
| 3 |      | 11.623 | 8445589 | 98.38  | 63431.19        | 4.72           |
| 4 |      | 17.158 | 26384   | 0.31   | 106622.62       | 27.45          |
| 5 |      | 17.462 | 14429   | 0.17   | 149002.46       | 1.52           |



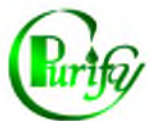

成都普瑞法科技开发有限公司  
Chengdu Biopurify Phytochemicals Ltd.

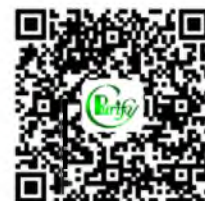

Add: No.11 Building, No. 388 Rongtaidadao CNSTP  
Wenjiang Zone, Chengdu, Sichuan, 611130 China  
TEL: 028-82633987 FAX: 028-82633165  
E-mail: biopurify@gmail.com sales@biopurify.com  
Web: www.biopurify.com

## Certificate of Analysis

**Product Name:** Neohesperidin Dihydrochal

**Other Name:** Neohesperidine Dihydrochalcone

**Catalogue No.:** BP0992

**Batch No.:** PRF7081416

**Report date:** 2016-08-14

**CAS Number:** 20702-77-6

**Mol. Formula:** C<sub>28</sub>H<sub>36</sub>O<sub>15</sub>

**Mol. Weight:** 612.581

**Type of compound:**

**Identification Method:** Mass, NMR

**Analysis Method of Purity:** HPLC-ELSD

**Structure:**

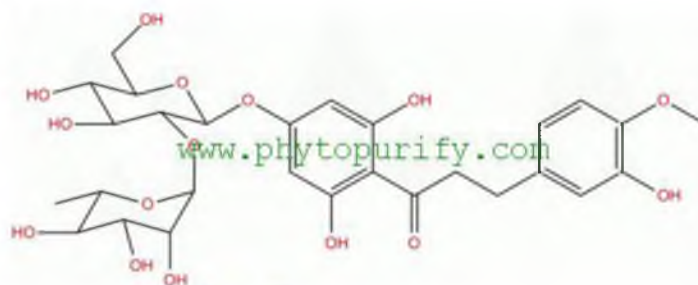

### Analytical result:

| Test                 | Specification    | Results          |
|----------------------|------------------|------------------|
| Appearance           | Off-white Powder | Off-white Powder |
| Loss on drying       | <3.0%            | 1.2%             |
| Purity (HPLC, ELSD)* | ≥98.0%           | 99.39 %          |

\* Please find HPLC chromatography attached.

**Package:** Brown vial or HDPE Plastic Bottle

**Storage:** Cool and Dry place, protected from light, keep package airproofed when not in use.

**Expiration:** two years (2018-08-14) under conditions list above.

QC: Meng Pan

Date: 2016-08-14

QA: Lianglei Zhang

Date: 2016-08-14



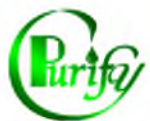

Data File D:\HPLC\DATA\NEOHESPERIDIN DIHYDROCHALCONE\PRF7081416.D  
Sample Name: Neohesperidin Dihydrochalcone

=====  
Acq. Operator : yzq  
Acq. Instrument : Instrument 1 Location : Vial 2  
Injection Date : 8/14/2016 1:00:51 PM Inj Volume : 10 µl  
Acq. Method : D:\YJH\METHOD\NEOHESPERIDIN DIHYDROCHALCONE.M  
Last changed: 8/14/2016 12:55:47 PM by yzq  
Analysis Method : D:\YJH\METHOD\HYPEROSIDE .M  
Last changed : 8/14/2016 1:25:21 PM by yzq  
(modified after loading)

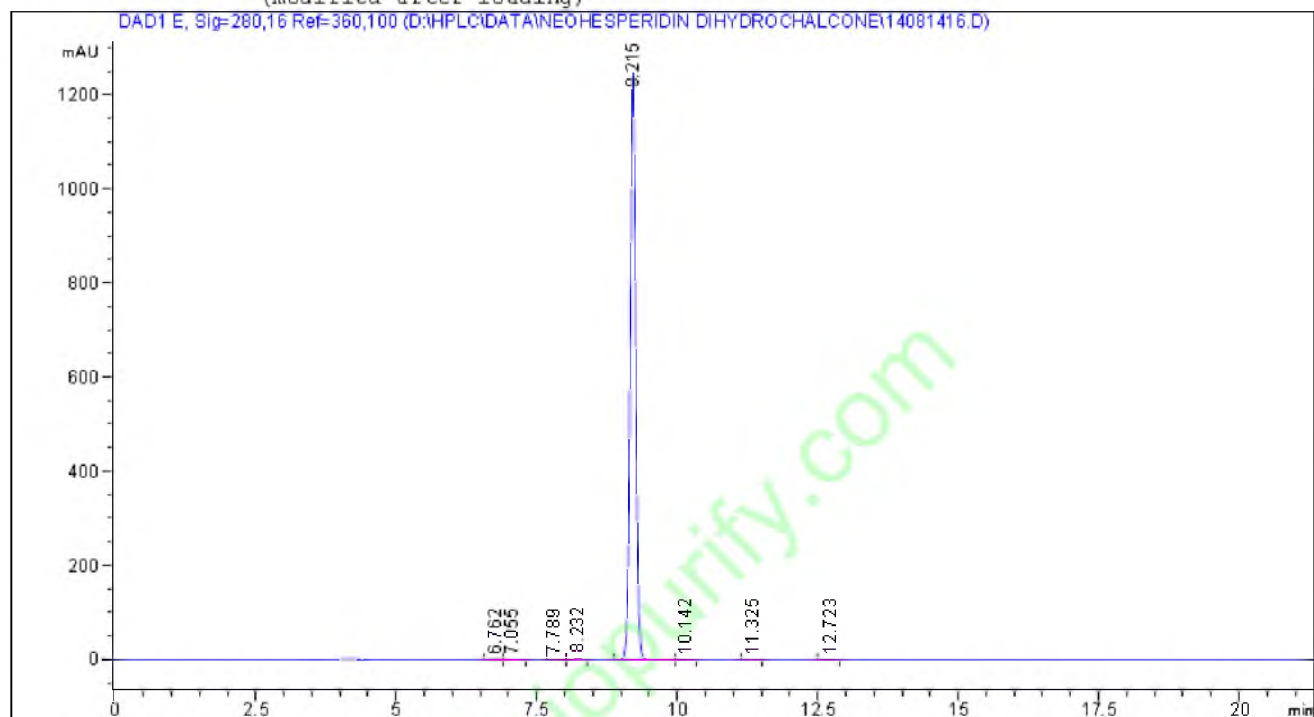

=====  
Area Percent Report  
=====

Sorted By : Signal  
Multiplier : 1.0000  
Dilution : 1.0000  
Use Multiplier & Dilution Factor with ISTDs

Signal 1: DAD1 E, Sig=280,16 Ref=360,100

| Peak # | RetTime [min] | Type | Width [min] | Area [mAU*s] | Height [mAU] | Area %  |
|--------|---------------|------|-------------|--------------|--------------|---------|
| 1      | 6.762         | VV   | 0.1148      | 3.16273      | 4.15340e-1   | 0.0365  |
| 2      | 7.055         | VV   | 0.1416      | 5.16198      | 5.03571e-1   | 0.0596  |
| 3      | 7.789         | VV   | 0.1310      | 2.69115      | 2.99090e-1   | 0.0311  |
| 4      | 8.232         | VV   | 0.1035      | 26.01729     | 3.81641      | 0.3003  |
| 5      | 9.215         | VV   | 0.1065      | 8611.60742   | 1248.48096   | 99.3979 |
| 6      | 10.142        | VV   | 0.1489      | 5.99620      | 5.60277e-1   | 0.0692  |
| 7      | 11.325        | VV   | 0.1163      | 5.72776      | 7.23783e-1   | 0.0661  |
| 8      | 12.723        | VV   | 0.1753      | 3.40924      | 2.70096e-1   | 0.0394  |

Totals : 8663.77376 1255.06952

产品分析证书  
Certificate of Analysis

中文名称: 柚皮苷二氢查尔酮

English Name: Naringin dihydrochalcone

别名 (Alias): Naringin DC

产品编码 (Cat. No.): BP0984

CAS Number: 18916-17-1

分子式 (M. F.): C<sub>27</sub>H<sub>34</sub>O<sub>14</sub>

分子量 (M. W.): 582.555

批号 (Batch No.): PRF7083123

报告日期 (Report date): 2016/8/31

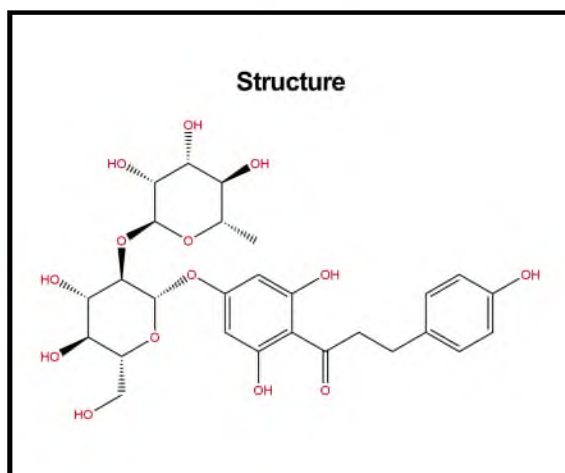

检验结果 (Analytical result):

| 检验项目 (Test Item)             | 检验指标 (Specifications)     | 检验结果 (Results)   |
|------------------------------|---------------------------|------------------|
| 外观 Appearance                | Off-white powder          | Off-white powder |
| 干燥失重 Loss on drying          | <3.0%                     | 1.24%            |
| 纯度 Purity (HPLC-DAD, 280nm)* | ≥98.0%                    | 99.58%           |
| 质谱 Mass                      | 582.555±1                 | Conforms         |
| 核磁 NMR                       | Comply with the structure | Conforms         |

\* 色谱图见附件 (Please find HPLC chromatography attached.)

贮存条件 (Storage): 2~8℃

复测期 (Retest date): two years (2018-08-30) under conditions list above.

备注 (Remarks): 如遇质量问题, 请于收到产品之日起 15 日内与我们联系。

In case of quality issue, please contact us within 15 days after receipt of the product.

QC:

Zhang Ling

Date: 2016年8月31日

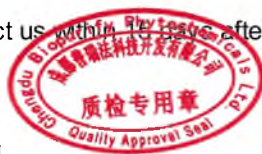

QA:

Wu Qi

Date: 2016年8月31日

# SAMPLE INFORMATION

|                   |                          |                     |                          |
|-------------------|--------------------------|---------------------|--------------------------|
| Sample Name:      | Naringin dihydrochaicone | Acquired By:        | System                   |
| Sample Type:      | Unknown                  | Sample Set Name:    |                          |
| Vial:             | 47                       | Acq. Method Set:    | Naringin dihydrochaicone |
| Injection #:      | 1                        | Processing Method:  | Samples                  |
| Injection Volume: | 5.00 ui                  | Channel Name:       | 280.0nm                  |
| Run Time:         | 25.0 Minutes             | Proc. Chnl. Descr.: | PDA 280.0 nm             |
| Date Acquired:    | 2016-8-31 11:22:53 CST   |                     |                          |
| Date Processed:   | 2016-8-31 12:44:08 CST   |                     |                          |

## Auto-Scaled Chromatogram

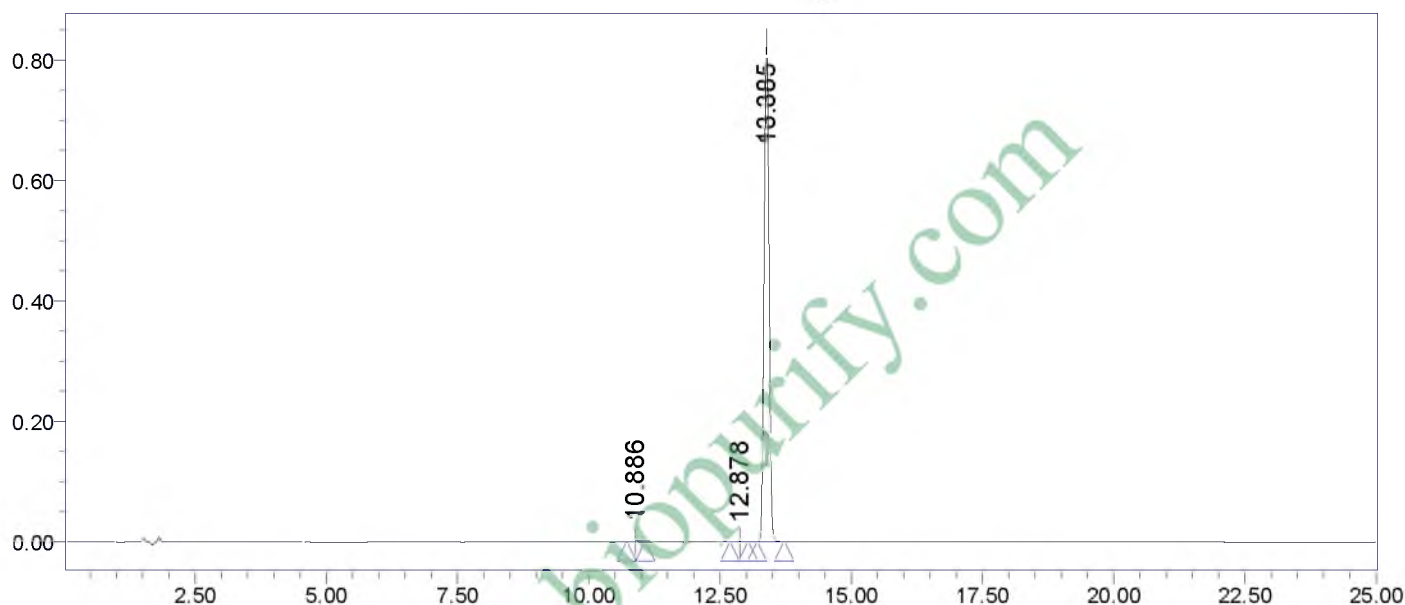

## Peak Results

|   | RT     | Area    | % Area | USP Plate Count | USP Resolution |
|---|--------|---------|--------|-----------------|----------------|
| 1 | 10.886 | 18809   | 0.35   | 39098.77        |                |
| 2 | 12.878 | 4012    | 0.07   | 70154.13        | 9.38           |
| 3 | 13.385 | 5400028 | 99.58  | 94752.10        | 2.68           |
